# Supplementary material for: Distribution of phylogenetic groups, adhesin genes, biofilm formation, and antimicrobial resistance of uropathogenic Escherichia coli isolated from hospitalized patients in Thailand
Source: PeerJ. 2020 Dec 2;8:e10453. doi: 10.7717/peerj.10453 (PMC7718785; doi:10.7717/peerj.10453)
Supplement: Supplemental Information 3 [file peerj-08-10453-s003.xlsx]

## Sheet: Sheet1
Table S3 The association between phylogenetic group and antimicrobial susceptibility patterns of uropathogenic Escherichia coli isolates
Antimicrobial agents		Phylogenetic group
		B2 (n = 122)				C (n = 26)				E (n = 25)				A (n = 10)				F (n = 9)				D (n = 6)				B1 (n = 5)				Unassignable (n = 3)				CladeI (n = 1)				Clade I or II (n = 1)
		B2	Non-B2	χ2	P-value	C	Non-C	χ2	P-value	E	Non-E	χ2	P-value	A	Non-A	χ2	P-value	F	Non-F	χ2	P-value	D	Non-D	χ2	P-value	B1	Non-B1	χ2	P-value	Unassign	Non-unassign	χ2	P-value	CladeI	Non-cladeI	χ2	P-value	CladeI/II	Non-cladeI/II	χ2	P-value
Penicillins
AMP	Resistant	100	75	1.038	0.308	25	150	3.216	0.073	22	153	0.318	0.573	8	167	0.135	0.714	6	169	2.15	0.143	6	169	1.165	0.28	4	171	0.066	0.798	3	172	0.574	0.449	0	175	5.329	0.021	1	174	0.189	0.663
	Susceptible	22	11			1	32			3	30			2	31			3	30			0	33			1	32			0	33			1	32			0	33
β-lactam/β-lactamase inhibitor combinations
AMC	Resistant	39	37	2.659	0.103	17	59	10.663	0.001	9	67	0.004	0.952	3	73	0.194	0.66	4	72	0.254	0.615	1	75	1.052	0.305	3	73	1.216	0.27	0	76	1.753	0.186	0	76	0.579	0.447	0	76	0.579	0.447
	Susceptible	83	49			9	123			16	116			7	125			5	127			5	127			2	130			3	129			1	131			1	131
TZP	Resistant	2	9	7.845	0.005	7	4	27.767	0	1	10	0.094	0.759	0	11	0.587	0.444	1	10	0.637	0.425	0	11	0.345	0.557	0	11	0.286	0.593	0	11	0.17	0.68	0	11	0.056	0.813	0	11	0.056	0.813
	Susceptible	120	77			19	178			24	173			10	187			8	189			6	191			5	192			3	194			1	196			1	196
SCF	Resistant	5	8	2.331	0.127	7	6	21.673	0	1	12	0.246	0.62	0	13	0.7	0.403	0	13	0.627	0.428	0	13	0.412	0.521	0	13	0.342	0.559	0	13	0.203	0.652	0	13	0.067	0.796	0	13	0.067	0.796
	Susceptible	117	78			19	176			24	171			10	185			9	186			6	189			5	190			3	192			1	194			1	194
Cephalosporins
KZ	Resistant	53	40	0.192	0.661	18	75	7.226	0.007	11	82	0.006	0.939	1	92	5.12	0.024	5	88	0.447	0.504	2	91	0.324	0.569	2	91	0.046	0.83	1	92	0.159	0.69	0	93	0.813	0.367	0	93	0.813	0.367
	Susceptible	69	46			8	107			14	101			9	106			4	111			4	111			3	112			2	113			1	114			1	114
CTX	Resistant	52	39	0.152	0.696	18	73	7.84	0.005	11	80	0.001	0.979	1	90	4.862	0.027	5	86	0.533	0.465	1	90	1.841	0.175	2	89	0.029	0.864	1	90	0.134	0.714	0	91	0.782	0.377	0	91	0.782	0.377
	Susceptible	70	47			8	109			14	103			9	108			4	113			5	112			3	114			2	115			1	116			1	116
CRO	Resistant	52	39	0.152	0.696	18	73	7.84	0.005	11	80	0.001	0.979	1	90	4.862	0.027	5	86	0.533	0.465	1	90	1.841	0.175	2	89	0.029	0.864	1	90	0.134	0.714	0	91	0.782	0.377	0	91	0.782	0.377
	Susceptible	70	47			8	109			14	103			9	108			4	113			5	112			3	114			2	115			1	116			1	116
CAZ	Resistant	52	39	0.152	0.696	18	73	7.84	0.005	11	80	0.001	0.979	1	90	4.862	0.027	5	86	0.533	0.465	1	90	1.841	0.175	2	89	0.029	0.864	1	90	0.134	0.714	0	91	0.782	0.377	0	91	0.782	0.377
	Susceptible	70	47			8	109			14	103			9	108			4	113			5	112			3	114			2	115			1	116			1	116
Carbapenems
IPM	Resistant	0	3	4.318	0.038	3	0	21.307	0	0	3	0.416	0.519	0	3	0.154	0.695	0	3	0.138	0.711	0	3	0.09	0.764	0	3	0.075	0.784	0	3	0.045	0.833	0	3	0.015	0.903	0	3	0.015	0.903
	Susceptible	122	83			23	182			25	180			10	195			9	196			6	199			5	200			3	202			1	204			1	204
MEM	Resistant	0	3	4.318	0.038	3	0	21.307	0	0	3	0.416	0.519	0	3	0.154	0.695	0	3	0.138	0.711	0	3	0.09	0.764	0	3	0.075	0.784	0	3	0.045	0.833	0	3	0.015	0.903	0	3	0.015	0.903
	Susceptible	122	83			23	182			25	180			10	195			9	196			6	199			5	200			3	202			1	204			1	204
ERT	Resistant	0	3	4.318	0.038	3	0	21.307	0	0	3	0.416	0.519	0	3	0.154	0.695	0	3	0.138	0.711	0	3	0.09	0.764	0	3	0.075	0.784	0	3	0.045	0.833	0	3	0.015	0.903	0	3	0.015	0.903
	Susceptible	122	83			23	182			25	180			10	195			9	196			6	199			5	200			3	202			1	204			1	204
Aminoglycosides
CN	Resistant	40	30	0.099	0.753	12	58	2.079	0.149	9	61	0.07	0.791	1	69	2.632	0.105	4	66	0.491	0.484	1	69	0.789	0.372	3	67	1.593	0.207	0	70	1.544	0.214	0	70	0.51	0.475	0	70	0.51	0.475
	Susceptible	82	56			14	124			16	122			9	129			5	133			5	133			2	136			3	135			1	137			1	137
AK	Resistant	0	1	1.425	0.233	0	1	0.144	0.705	0	1	0.137	0.711	0	1	0.051	0.822	1	0	22.218	0	0	1	0.03	0.863	0	1	0.025	0.875	0	1	0.015	0.903	0	1	0.005	0.944	0	1	0.005	0.944
	Susceptible	122	85			26	181			25	182			10	197			8	199			6	201			5	202			3	204			1	206			1	206
NET	Resistant	0	1	1.425	0.233	0	1	0.144	0.705	0	1	0.137	0.711	0	1	0.051	0.822	1	0	22.218	0	0	1	0.03	0.863	0	1	0.025	0.875	0	1	0.015	0.903	0	1	0.005	0.944	0	1	0.005	0.944
	Susceptible	122	85			26	181			25	182			10	197			8	199			6	201			5	202			3	204			1	206			1	206
Fluoroquinolones
CIP	Resistant	87	49	4.58	0.032	25	111	12.43	0	10	126	8.09	0.004	4	132	2.991	0.084	5	131	0.402	0.526	1	135	6.479	0.011	2	134	1.459	0.227	2	134	0.002	0.963	0	136	1.898	0.168	0	136	1.898	0.168
	Susceptible	35	37			1	71			15	57			6	66			4	68			5	67			3	69			1	71			1	71			1	71
NOR	Resistant	87	49	4.58	0.032	25	111	12.43	0	10	126	8.09	0.004	4	132	2.991	0.084	5	131	0.402	0.526	1	135	6.479	0.011	2	134	1.459	0.227	2	134	0.002	0.963	0	136	1.898	0.168	0	136	1.898	0.168
	Susceptible	35	37			1	71			15	57			6	66			4	68			5	67			3	69			1	71			1	71			1	71
LEV	Resistant	86	49	4.045	0.044	25	110	12.739	0	10	125	7.737	0.005	4	131	2.86	0.091	5	130	0.361	0.548	1	134	6.311	0.012	2	133	1.395	0.238	2	133	0.004	0.949	0	135	1.858	0.173	0	135	1.858	0.173
	Susceptible	36	37			1	72			15	58			6	67			4	69			5	68			3	70			1	72			1	72			1	72
Folate pathway inhibitors
SXT	Resistant	59	54	4.233	0.04	20	93	6.114	0.013	16	97	1.072	0.301	5	108	0.079	0.778	6	107	0.577	0.447	4	109	0.379	0.538	2	111	0.424	0.515	1	112	0.541	0.462	0	113	1.195	0.274	0	113	1.195	0.274
	Susceptible	63	32			6	89			9	86			5	90			3	92			2	93			3	92			2	93			1	94			1	94
Fosfomycins
FOS	Resistant	0	1	1.425	0.233	0	1	0.144	0.705	0	1	0.137	0.711	1	0	19.896	0	0	1	0.045	0.831	0	1	0.03	0.863	0	1	0.025	0.875	0	1	0.015	0.903	0	1	0.005	0.944	0	1	0.005	0.944
	Susceptible	122	85			26	181			25	182			9	198			9	198			6	201			5	202			3	204			1	206			1	206
Amp, ampicillin; AMC, amoxicillin-clavulanic acid; TZP, piperacillin-tazobactam; SCF, cefoperazone-sulbactam; KZ, cefazolin; CTX, cefotaxime; CRO, ceftriaxone; CAZ, ceftazidime; CN, gentamicin; CIP, ciprofloxacin; NOR, norfloxacin; LEV, levofloxacin;
SXT, trimethoprim-sulfamethoxazole; IPM, Imipenem; MEM, meropenem; ERT, ertapenem; CN, gentamicin; AK, amikacin; NET, netilmicin; FOS, fosfomycin
