# Supplementary material for: Distribution of phylogenetic groups, adhesin genes, biofilm formation, and antimicrobial resistance of uropathogenic Escherichia coli isolated from hospitalized patients in Thailand
Source: PeerJ. 2020 Dec 2;8:e10453. doi: 10.7717/peerj.10453 (PMC7718785; doi:10.7717/peerj.10453)
Supplement: Supplemental Information 6 [file peerj-08-10453-s006.xlsx]

## Sheet: February
No.	Age (Y)	Gender	Ward	Specimen	Phylogenetic group	fimH (559)	pap (336)	sfa (410)	afa (750)	Biofilm ability	MDR
1	90	Female	Stroke Unit	Cath	C	-	-	+	-	weak	MDR
2	91	Female	Internal medicine	Cath	E	+	+	-	-	none	Non-MDR
3	91	Female	Internal medicine	Cath	E	+	+	-	-	none	Non-MDR
4	74	Female	ER	Cath	B2	+	+	-	-	Moderate	MDR
5	80	Female	ER	MSU	B2	+	+	-	-	none	Non-MDR
6	1	Male	Pediatrics	MSU	B2	+	+	-	-	Moderate	MDR
7	49	Male	ER	Cath	B2	+	+	-	-	weak	MDR
8	40	Female	ER	Cath	B2	+	-	+	-	none	Non-MDR
9	77	Female	ER	Cath	B1	+	+	-	-	Strong	Non-MDR
10	47	Female	Internal medicine	MSU	B2	+	-	+	-	none	Non-MDR
11	93	Female	ICU	Cath	B2	+	+	-	-	Moderate	MDR
12	45	Female	Internal medicine	Cath	B2	+	+	-	-	Moderate	Non-MDR
13	75	Female	ICU	Cath	B2	+	+	-	-	weak	MDR
14	67	Female	ICU	Cath	E	+	-	-	-	weak	Non-MDR
15	84	Female	ER	Cath	B2	+	+	-	-	weak	MDR
16	64	Female	Internal medicine	Cath	B2	+	+	-	-	none	Non-MDR
17	90	Male	ER	Cath	B2	+	-	+	-	weak	Non-MDR
18	3	Female	Pediatrics	MSU	Unknown	-	+	-	+	none	Non-MDR
19	80	Female	Surgery	Cath	B2	+	+	-	-	Moderate	Non-MDR
20	31	Female	OPD	MSU	B2	+	+	+	-	none	Non-MDR
21	78	Male	ICU	Cath	E	+	-	-	+	none	MDR
22	60	Female	Internal medicine	Cath	F	+	+	+	-	none	Non-MDR
23	79	Female	ER	Cath	B2	+	+	-	-	none	Non-MDR
24	89	Female	Internal medicine	MSU	B2	+	+	-	-	Moderate	MDR
25	69	Female	Internal medicine	Cath	B2	+	+	-	-	none	MDR
26	45	Female	ICU	Cath	C	+	-	-	-	none	MDR
27	51	Female	Internal medicine	Cath	A	+	+	-	-	none	MDR
28	80	Female	ICU	Cath	B2	+	+	-	-	Moderate	MDR
29	51	Male	ER	Cath	B2	+	-	-	+	weak	MDR
30	84	Female	Internal medicine	Cath	A	+	+	-	-	none	Non-MDR
31	81	Female	Internal medicine	Cath	B2	+	+	-	-	weak	Non-MDR
32	76	Female	Internal medicine	Cath	B2	+	+	+	-	none	Non-MDR
33	1	Female	OPD	MSU	D	-	+	-	-	none	MDR
34	60	Female	Internal medicine	Cath	C	+	+	-	-	none	MDR
35	64	Female	Internal medicine	Cath	B2	+	+	-	-	Moderate	MDR
36	70	Male	ER	MSU	B2	+	+	-	-	Moderate	MDR
37	77	Female	ER	Cath	A	+	+	-	-	none	Non-MDR
38	65	Female	Internal medicine	Cath	B2	+	-	-	-	none	Non-MDR
39	79	Female	Internal medicine	Cath	B2	+	+	-	-	weak	MDR
40	70	Female	Internal medicine	Cath	B2	+	+	-	-	Moderate	MDR
41	88	Female	Internal medicine	Cath	B2	+	+	+	-	weak	Non-MDR
42	75	Female	OPD	Cath	B2	-	+	-	-	weak	MDR
43	74	Male	Internal medicine	Cath	B2	+	+	-	-	none	Non-MDR
44	25	Female	ER	MSU	B2	-	-	+	-	none	Non-MDR
45	68	Female	ER	MSU	A	+	+	-	-	none	Non-MDR
46	23	Female	ER	Cath	Clade I	+	+	-	-	none	Non-MDR
47	92	Female	ER	Cath	F	+	+	-	-	none	Non-MDR
48	56	Male	BURN	Cath	C	+	-	-	-	none	MDR
49	2	Female	Pediatrics	MSU	B2	+	+	-	+	weak	MDR
50	81	Male	Internal medicine	MSU	B2	+	+	-	-	weak	MDR
51	79	Male	Internal medicine	MSU	B2	+	-	+	-	weak	MDR
52	51	Female	Internal medicine	Cath	B2	+	+	-	-	weak	MDR
53	78	Female	Internal medicine	Cath	B2	+	+	-	-	Moderate	MDR
54	85	Female	ER	Cath	B2	+	+	-	-	Moderate	Non-MDR
55	71	Female	ICU	Cath	B2	+	+	-	-	weak	MDR
56	63	Female	ICU	Cath	B2	+	+	-	+	Moderate	MDR
57	84	Female	OPD	Cath	B2	+	-	+	-	none	MDR
58	83	Female	Internal medicine	Cath	B2	+	+	-	-	weak	MDR
59	83	Female	Internal medicine	Cath	B2	+	+	-	-	Moderate	MDR
60	69	Male	ER	Cath	B2	+	+	-	-	weak	MDR
61	85	Male	Internal medicine	Cath	B2	+	+	-	-	weak	MDR
62	70	Female	Internal medicine	Cath	D	+	+	-	-	none	Non-MDR
63	55	Female	OPD	MSU	B2	+	-	-	-	Moderate	MDR
64	93	Female	ICU	Cath	F	-	-	+	-	none	MDR
65	82	Female	Internal medicine	Cath	B2	+	+	-	-	Moderate	MDR
66	72	Female	ICU	Cath	B2	-	+	+	-	none	Non-MDR
67	51	Male	ER	Cath	B2	-	-	-	+	Moderate	MDR
68	64	Female	Internal medicine	Cath	C	+	+	-	-	none	MDR
69	66	Female	ICU	Cath	E	+	-	-	-	none	MDR
70	7	Male	OPD	MSU	E	+	+	-	-	none	Non-MDR
71	65	Female	Internal medicine	MSU	C	+	+	-	-	none	MDR
72	85	Female	ICU	Cath	A	+	+	-	-	none	Non-MDR
73	70	Female	Surgery	Cath	C	+	+	-	-	none	MDR
74	5	Female	Pediatrics	MSU	A	+	+	-	-	none	MDR
75	76	Female	Internal medicine	MSU	B2	+	+	-	-	none	MDR
76	21	Female	Internal medicine	MSU	B2	+	+	-	-	none	Non-MDR
77	73	Female	ICU	Cath	C	-	+	-	-	none	MDR
78	33	Female	ER	MSU	B2	+	+	-	-	weak	MDR
79	83	Female	Internal medicine	Cath	B2	+	+	-	-	weak	MDR
80	49	Male	ICU	Cath	B2	+	+	-	-	weak	Non-MDR
81	78	Female	Internal medicine	Cath	E	+	+	-	-	none	MDR
82	49	Female	ICU	Cath	A	+	+	-	-	none	Non-MDR
83	42	Female	OPD	MSU	C	+	+	-	-	none	Non-MDR
84	15	Female	OPD	MSU	B2	+	+	-	-	Moderate	Non-MDR
85	76	Male	Stroke Unit	Cath	A	+	+	-	-	none	MDR
86	21	Female	OPD	MSU	F	+	+	-	-	weak	MDR
87	49	Female	Internal medicine	Cath	B2	+	+	-	-	none	MDR
88	70	Female	ICU	Cath	B2	+	+	-	-	Moderate	Non-MDR
89	83	Female	Internal medicine	Cath	F	+	+	-	-	none	MDR
90	95	Female	ER	Cath	B2	+	+	-	-	Moderate	MDR
91	91	Female	Surgery	Cath	A	+	+	-	-	none	Non-MDR
92	29	Female	Internal medicine	MSU	B2	+	+	-	-	weak	MDR
93	74	Female	Surgery	Cath	F	-	-	+	-	none	Non-MDR
94	66	Male	ICU	Cath	B2	+	+	-	-	weak	MDR
95	22	Female	ER	MSU	B2	+	+	-	-	none	Non-MDR
96	75	Female	Internal medicine	Cath	B2	+	+	-	-	Moderate	MDR
97	80	Female	Internal medicine	Cath	F	-	+	-	+	none	MDR
98	70	Female	Internal medicine	Cath	D	+	+	-	-	none	Non-MDR
99	78	Female	Internal medicine	Cath	C	+	+	-	-	none	Non-MDR
100	69	Male	Internal medicine	Cath	C	+	+	-	-	weak	MDR
101	85	Male	Internal medicine	Cath	B2	+	+	-	-	weak	MDR
102	81	Male	Internal medicine	Cath	C	+	-	-	-	none	MDR
103	53	Female	ER	Cath	B2	+	-	-	-	weak	MDR
104	90	Male	Internal medicine	Cath	C	+	+	-	-	none	MDR
105	53	Female	OPD	MSU	E	-	-	-	+	none	MDR
106	77	Female	OPD	MSU	E	+	-	+	-	none	Non-MDR
107	81	Female	OPD	MSU	D	+	+	-	-	none	Non-MDR
108	84	Female	OPD	Cath	B2	+	+	-	-	Moderate	MDR
109	88	Female	Internal medicine	Cath	B2	+	+	-	-	none	Non-MDR
110	28	Male	Internal medicine	Cath	E	+	-	-	-	none	MDR
111	67	Female	ER	MSU	B2	+	+	-	-	weak	MDR
112	71	Female	Stroke Unit	Cath	B2	-	+	+	-	weak	Non-MDR
113	77	Female	Internal medicine	Cath	B2	+	+	-	-	none	Non-MDR
114	62	Male	ER	MSU	C	+	+	-	-	none	MDR
115	44	Male	Internal medicine	Cath	B2	+	+	-	-	weak	MDR
116	81	Female	Internal medicine	MSU	C	+	+	-	-	none	MDR
117	60	Male	Internal medicine	Cath	E	+	-	-	-	none	Non-MDR
118	68	Female	ICU	Cath	B2	+	-	+	-	none	Non-MDR
119	66	Female	OPD	MSU	C	+	+	-	-	none	Non-MDR
120	82	Female	ICU	Cath	B2	+	+	+	-	none	Non-MDR
121	89	Female	Internal medicine	Cath	B2	+	+	-	-	Moderate	MDR
122	83	Female	ER	Cath	B2	+	+	-	-	none	MDR
123	18	Male	Internal medicine	MSU	B2	+	+	-	-	Moderate	MDR
124	55	Female	Internal medicine	MSU	B2	+	+	-	-	weak	MDR
125	64	Female	Stroke Unit	Cath	C	+	-	-	-	none	MDR
126	79	Female	Internal medicine	MSU	B2	+	+	-	-	none	MDR
127	50	Female	Surgery	MSU	B2	+	+	-	-	none	MDR
128	71	Female	ICU	MSU	E	+	+	-	+	none	MDR
129	82	Female	OPD	Cath	C	+	+	-	-	none	MDR
130	71	Male	Internal medicine	Cath	B2	+	+	-	-	Strong	MDR
131	2	Male	ICU	Cath	B2	+	+	+	-	Moderate	MDR
132	95	Female	Internal medicine	Cath	C	+	+	-	-	none	MDR
133	62	Male	ICU	Cath	B2	+	+	-	-	Moderate	MDR
134	59	Female	ER	MSU	B2	+	-	-	-	Strong	Non-MDR
135	90	Female	Internal medicine	Cath	B2	+	+	+	-	none	Non-MDR
136	88	Male	Internal medicine	Cath	E	+	+	-	-	none	MDR
137	1	Female	Pediatrics	MSU	B2	+	-	+	-	none	MDR
138	78	Female	ER	Cath	B2	+	+	-	-	none	Non-MDR
139	76	Female	ER	Cath	B2	+	-	-	-	weak	Non-MDR
140	65	Female	ER	Cath	E	+	-	-	-	none	MDR
141	87	Female	Internal medicine	Cath	E	+	+	-	-	none	MDR
142	70	Female	Internal medicine	Cath	C	+	-	-	-	none	Non-MDR
143	70	Female	OPD	MSU	B2	+	+	-	-	weak	Non-MDR
144	69	Female	Surgery	Cath	E	+	+	-	-	none	MDR
145	90	Male	Internal medicine	Cath	B2	+	+	-	-	none	MDR
146	53	Female	Surgery	Cath	E	+	+	-	-	none	MDR
147	9	Female	Pediatrics	MSU	E	-	+	-	+	none	MDR
148	1	Male	Pediatrics	MSU	E	-	+	-	+	none	MDR
149	88	Male	Internal medicine	MSU	B2	+	-	-	-	Moderate	MDR
150	88	Male	ICU	Cath	B2	+	+	-	-	Moderate	MDR
151	89	Female	OPD	MSU	B2	+	+	-	-	weak	Non-MDR
152	92	Female	Internal medicine	Cath	E	+	+	-	-	none	Non-MDR
153	78	Male	Internal medicine	Cath	B2	+	+	-	-	Moderate	MDR
154	70	Female	ER	Cath	B2	+	+	-	-	none	Non-MDR
155	62	Female	Internal medicine	Cath	B2	+	+	-	-	weak	Non-MDR
156	34	Female	OPD	MSU	Unknown	+	+	-	-	none	Non-MDR
157	71	Female	ER	Cath	D	+	-	-	-	none	Non-MDR
158	78	Male	Internal medicine	Cath	B2	+	-	-	+	none	MDR
159	76	Female	Internal medicine	Cath	B2	+	+	-	-	weak	MDR
160	38	Female	OPD	MSU	B2	+	+	-	-	Moderate	Non-MDR
161	88	Female	Surgery	Cath	B1	+	+	-	-	none	MDR
162	73	Male	Internal medicine	Cath	B2	+	-	+	-	none	Non-MDR
163	79	Female	ER	Cath	E	+	+	-	+	none	Non-MDR
164	76	Female	Internal medicine	Cath	F	+	+	-	-	Moderate	MDR
165	88	Female	ER	Cath	B2	+	-	-	+	weak	MDR
166	55	Male	Surgery	Cath	B1	+	+	-	-	none	MDR
167	39	Female	ICU	MSU	B2	+	+	-	-	Moderate	MDR
168	79	Female	ER	Cath	E	+	+	-	-	none	Non-MDR
169	72	Female	ICU	Cath	B2	+	+	-	-	weak	MDR
170	58	Male	Stroke Unit	MSU	B2	+	+	-	-	weak	MDR
171	45	Female	Surgery	Cath	E	+	-	-	-	none	Non-MDR
172	27	Male	ER	Cath	F	+	+	-	-	none	MDR
173	63	Female	ER	MSU	B2	+	+	-	-	Moderate	Non-MDR
174	83	Female	ICU	Cath	B2	+	+	-	-	weak	MDR
175	75	Female	ICU	Cath	Unknown	+	+	-	-	Moderate	MDR
176	60	Male	ER	MSU	B2	-	-	+	-	none	Non-MDR
177	51	Male	BURN	Cath	E	+	-	-	+	none	Non-MDR
178	91	Male	ER	Cath	C	+	+	-	-	none	MDR
179	74	Female	Internal medicine	Cath	Clade I or II	-	+	-	-	weak	Non-MDR
180	72	Male	Internal medicine	Cath	C	+	+	-	-	none	MDR
181	76	Female	OPD	Cath	B2	+	+	-	-	weak	MDR
182	95	Female	Internal medicine	Cath	B2	+	+	-	-	weak	MDR
183	3 months	Female	Pediatrics	MSU	B2	+	+	-	-	none	MDR
184	46	Female	ER	Cath	C	+	+	-	-	none	MDR
185	42	Female	Internal medicine	MSU	B2	+	+	-	-	weak	MDR
186	83	Male	ICU	Cath	B2	+	+	-	-	weak	MDR
187	78	Female	Internal medicine	MSU	B2	+	+	-	-	none	Non-MDR
188	66	Male	ER	MSU	D	+	+	-	-	none	Non-MDR
189	79	Female	Internal medicine	Cath	B2	+	+	-	-	Moderate	Non-MDR
190	46	Female	ER	Cath	C	+	+	-	-	none	MDR
191	88	Female	ICU	Cath	B2	+	+	-	-	weak	Non-MDR
192	35	Male	Surgery	Cath	B2	+	+	-	-	none	MDR
193	74	Male	ER	Cath	B2	+	-	-	-	Strong	MDR
194	57	Male	Internal medicine	Cath	B2	+	+	-	-	Moderate	MDR
195	52	Male	ICU	Cath	B2	+	+	-	-	none	MDR
196	88	Female	ICU	Cath	B2	+	-	+	-	none	MDR
197	84	Female	Internal medicine	Cath	E	+	-	-	+	none	MDR
198	63	Female	Internal medicine	MSU	B2	+	+	-	-	Moderate	MDR
199	77	Female	ER	MSU	B2	+	+	-	-	weak	Non-MDR
200	99	Male	ER	Cath	B2	+	+	-	-	weak	Non-MDR
201	58	Male	ICU	Cath	C	+	+	-	-	weak	MDR
202	41	Male	Surgery	MSU	B2	+	+	-	-	weak	Non-MDR
203	66	Female	Internal medicine	Cath	B2	+	+	-	-	weak	MDR
204	89	Female	ER	Cath	B1	+	-	+	-	weak	MDR
205	75	Female	OPD	Cath	B1	+	+	-	-	none	MDR
206	72	Female	ICU	Cath	C	+	+	-	-	none	MDR
207	52	Female	OPD	MSU	B2	+	+	-	-	Moderate	MDR
208	75	Male	ICU	Cath	A	+	+	-	-	none	MDR
